# Supplementary material
Source: PubMed Central journal article supplement (PMC4829076)

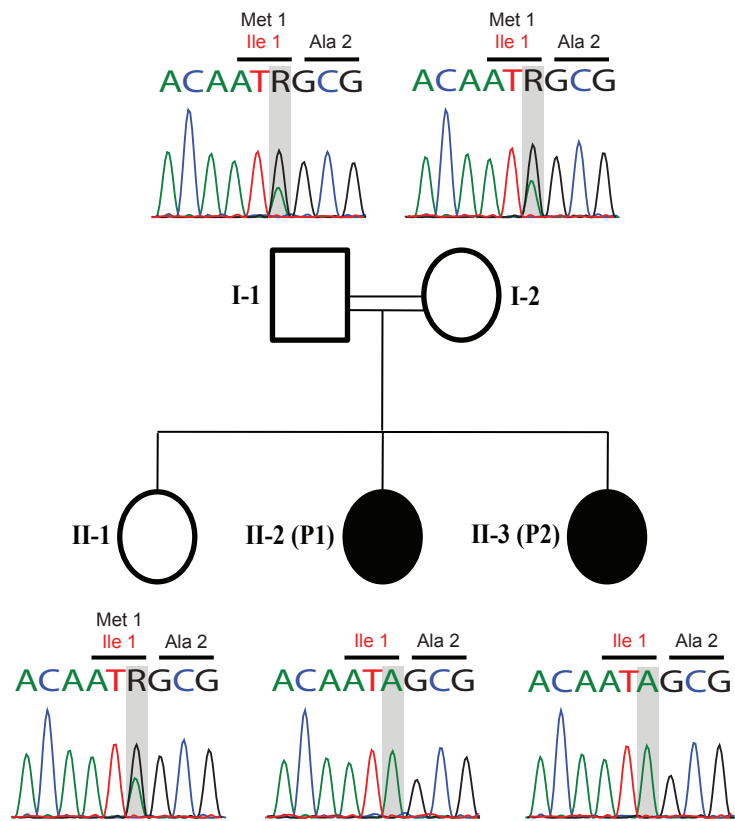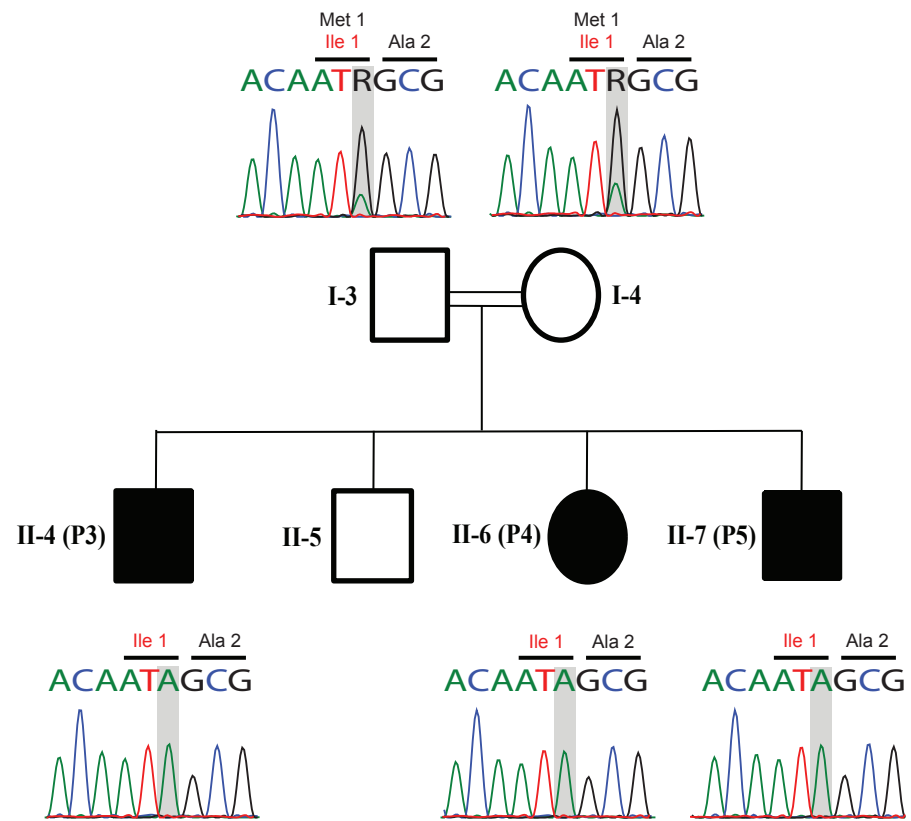

Supplementary Figure 2

Supplement: NIHMS774550-supplement-Sfig2.pdf [file NIHMS774550-supplement-Sfig2.pdf]

Family B

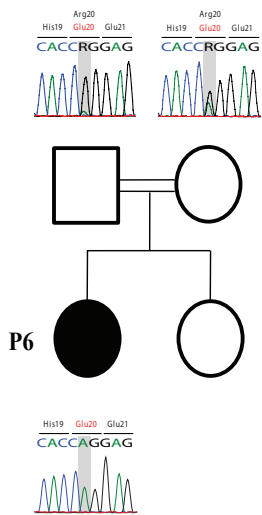

Family C

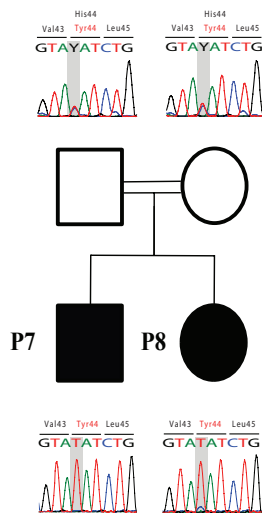

Family D

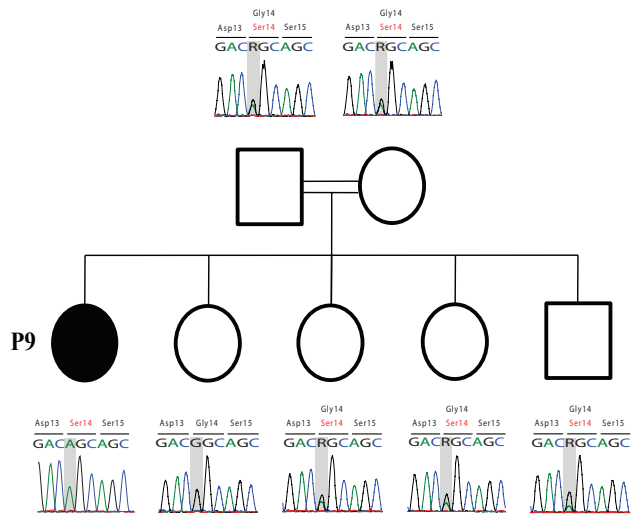

Family E

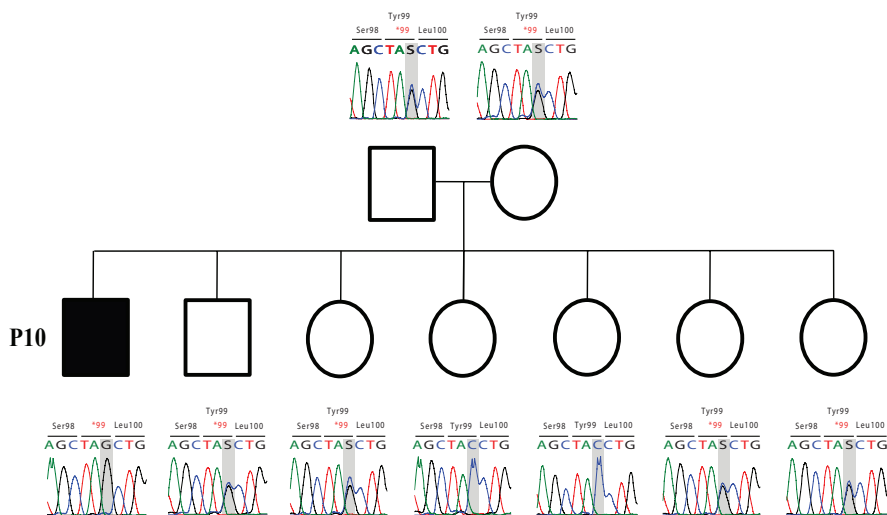

Family F

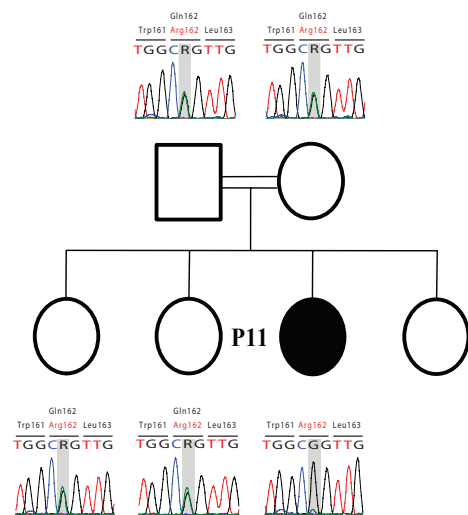

Family G

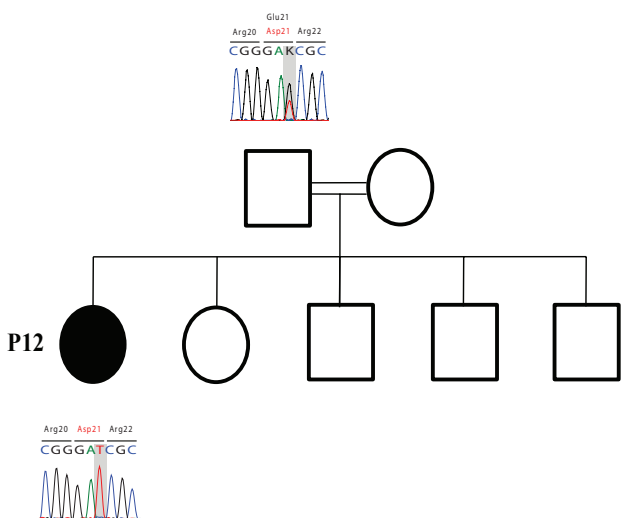

Family H

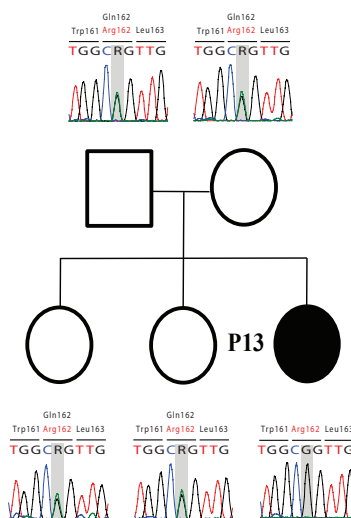

Family I

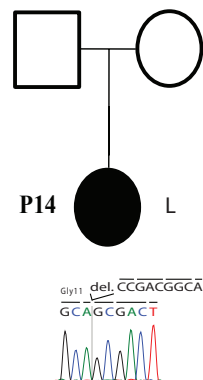

Supplementary Figure 3

Supplement: NIHMS774550-supplement-Sfig3.pdf [file NIHMS774550-supplement-Sfig3.pdf]
